# Supplementary material
Source: PubMed Central journal article supplement (PMC6444932)

# Supplemental Figure 1

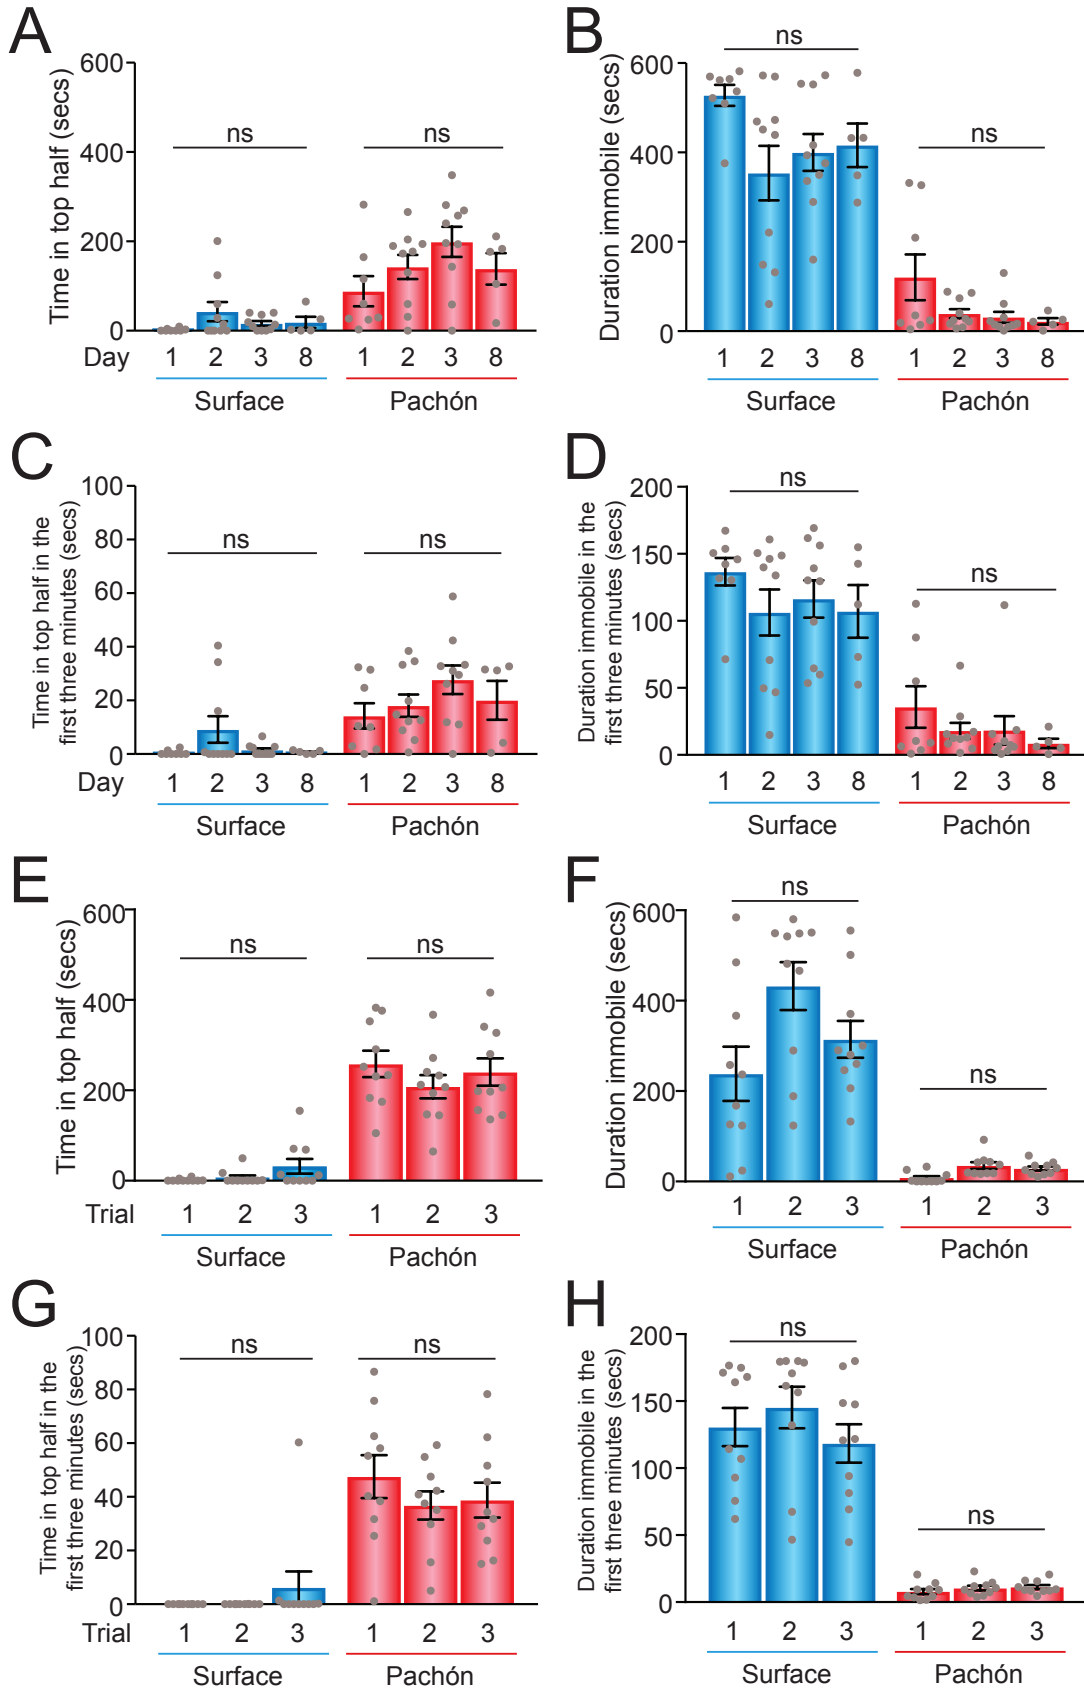

# Supplemental Figure 2

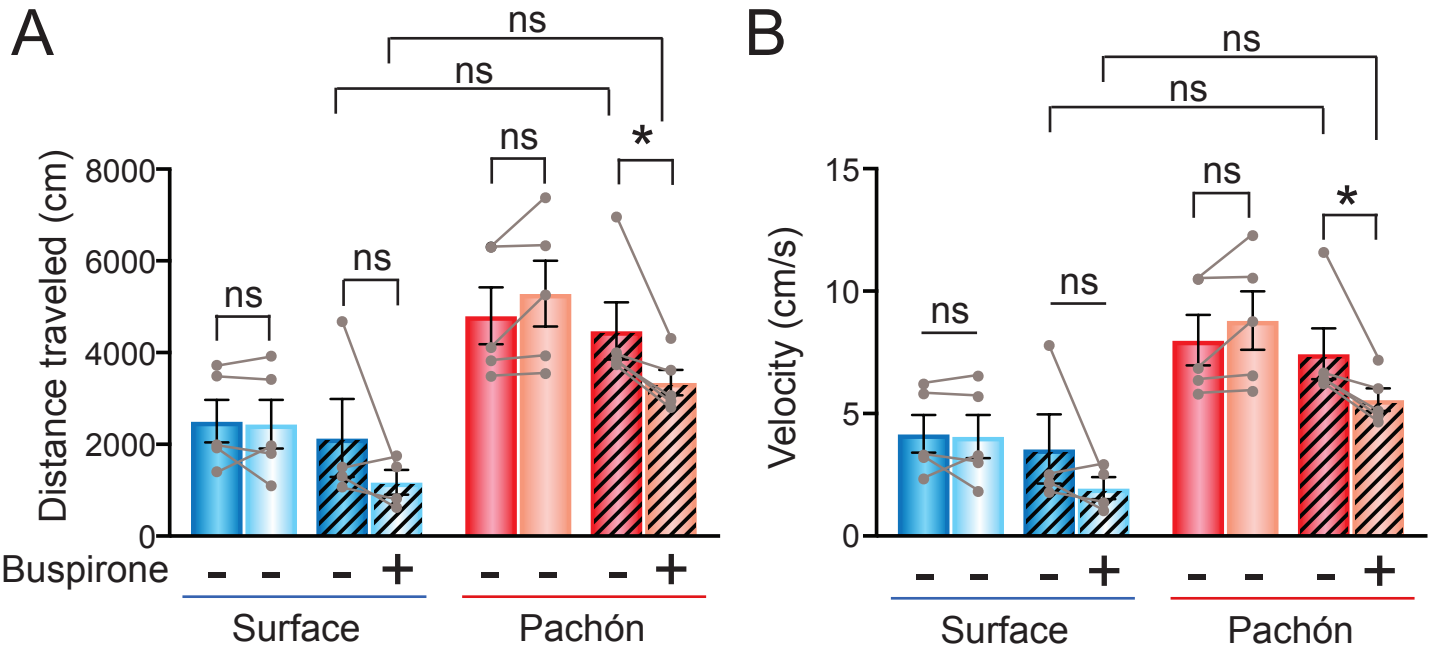

# Supplemental Figure 3

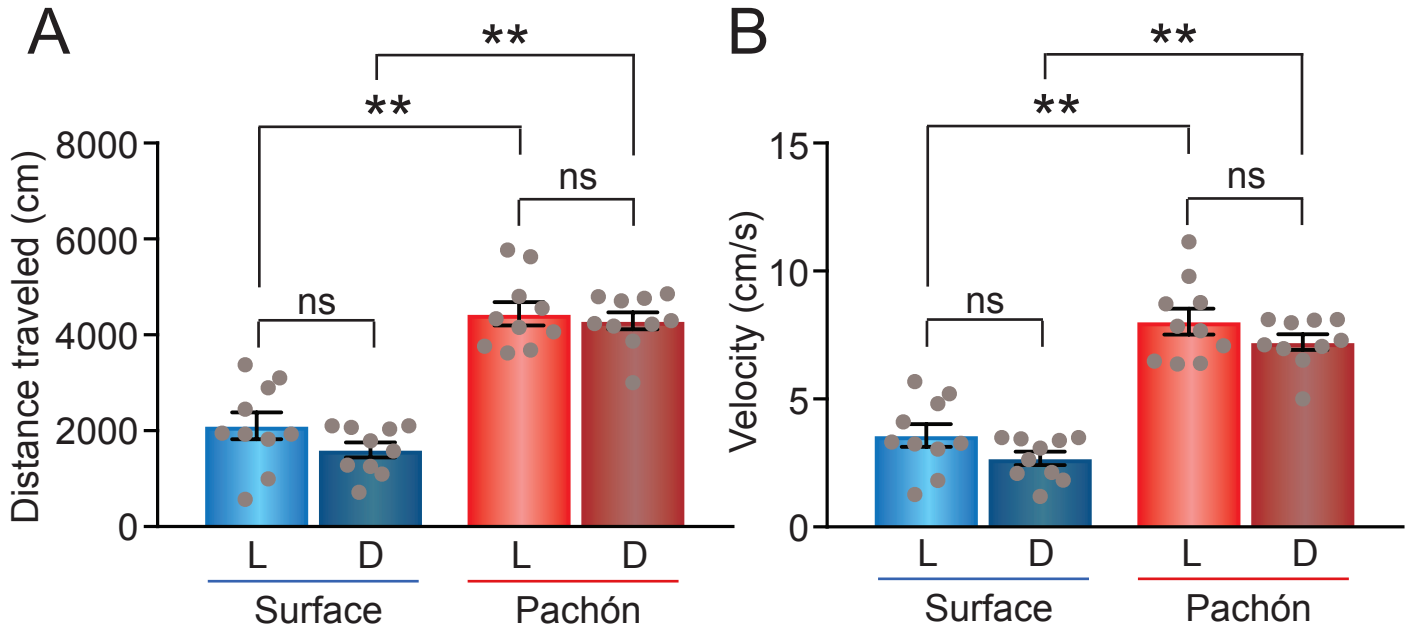

# Supplemental Figure 4

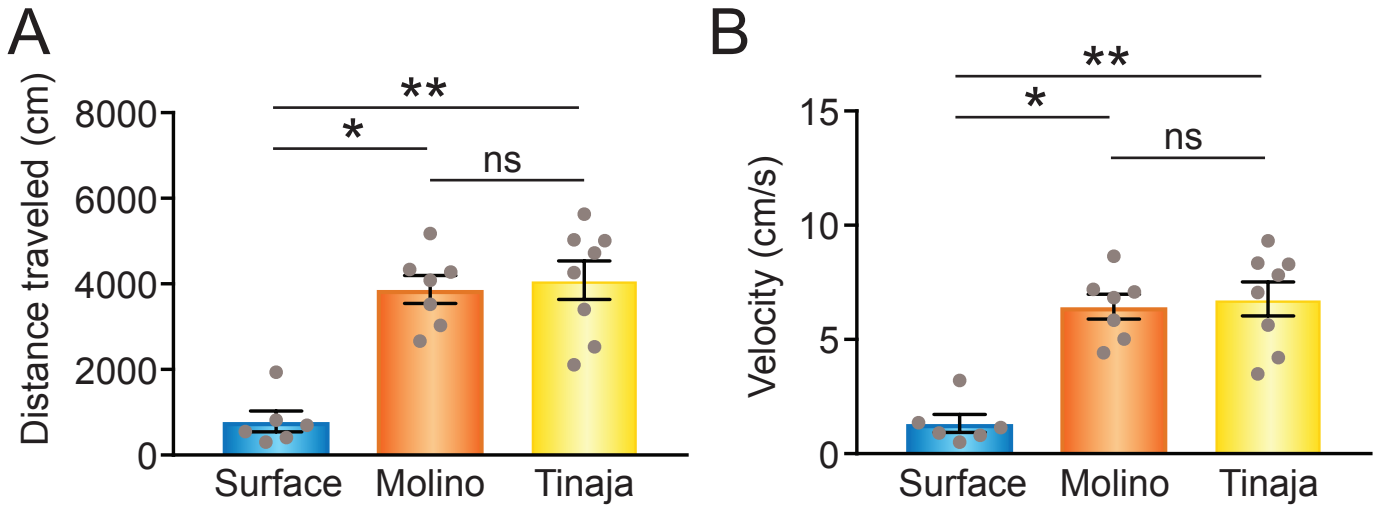

Supplement: NIHMS1009991-supplement-supp.pdf [file NIHMS1009991-supplement-supp.pdf]
